# Supplementary material
Source: publisher site journal article supplement (https://www.spandidos-publications.com/8632/downloadSupplementary)
Supplement: Supplementary file 1 [file downloadSupplementary]

Table SI. Sequences of the siRNAs.

| siRNA             | Forward, 5'→3'        | Reverse, 3'→5'        |
|-------------------|-----------------------|-----------------------|
| siRNA NC          | UUCUCCGAACGUGUCACGUTT | ACGUGACACGUUCGGAGAATT |
| siRNA PTPN22-262  | GGCCCAAGAAUAUCAAGAATT | UUCUUGAUUUCUUGGGCCTT  |
| siRNA PTPN22-451  | GGAGGAUGAUCUGGGAAUATT | UAUUCCCAGAUCAUCCUCCTT |
| siRNA PTPN22-1182 | GGCCUUAGAACUUCUAAGATT | UCUUAGAAGUUCUAAGGCCTT |

si, small interfering; NC, negative control; PTPN, protein tyrosine phosphatase non-receptor type.
